# Supplementary material for: A lingering mouthwash with sustained antibiotic release and biofilm eradication for periodontitis
Source: Royal Society of Chemistry journal article supplement (doi:10.1039/d1tb01742j), 2021-01-01
Supplement: d1tb01742j1.pdf [file d1tb01742j1.pdf]

## *Supporting Information*

### **A lingering mouthwash with sustained antibiotic release and biofilm eradication for periodontitis**

Bohua Li<sup>a,1</sup>, Liuqi Shi<sup>a,b,1</sup>, Ruixing Liu<sup>a</sup>, Zhanrong Li<sup>a,\*</sup>, Shaokui Cao<sup>b</sup>, Jingguo Li<sup>a,b,\*</sup>

<sup>a</sup>*Henan Provincial People's Hospital, People's Hospital of Zhengzhou University, Zhengzhou 450003, China*

<sup>b</sup>*School of Material Science and Engineering, Zhengzhou University, Zhengzhou 450001, China*

\*Corresponding author at: Henan Provincial People's Hospital, People's Hospital of Zhengzhou University, Zhengzhou 450003, China.

E-mail addresses: lizhanrong@zzu.edu.cn (Z. Li), lijingguo@zzu.edu.cn (J. Li).

<sup>1</sup>These authors contribute equally to this work.

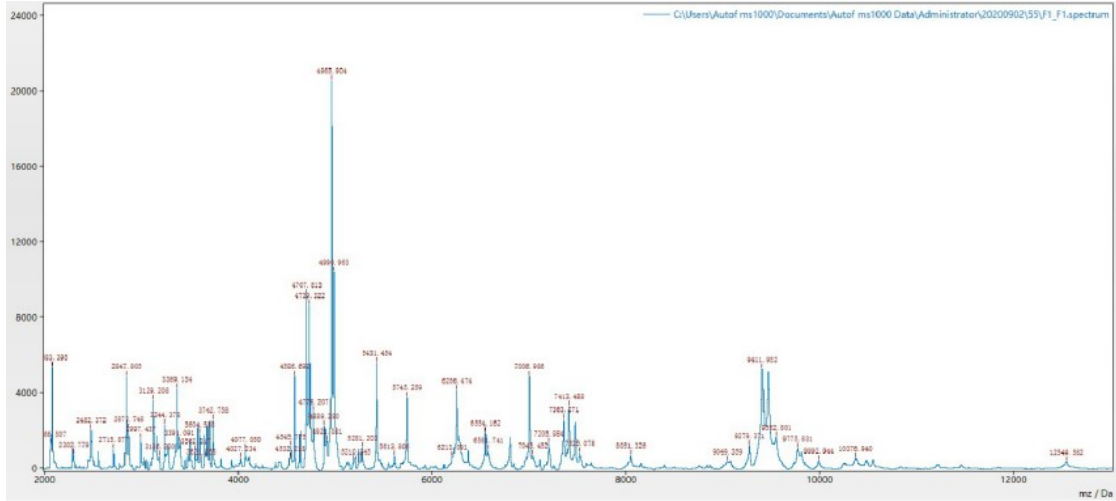

**Fig. S1.** Identify *P. gingivalis* BNCC 353909 by Mass spectrometry.

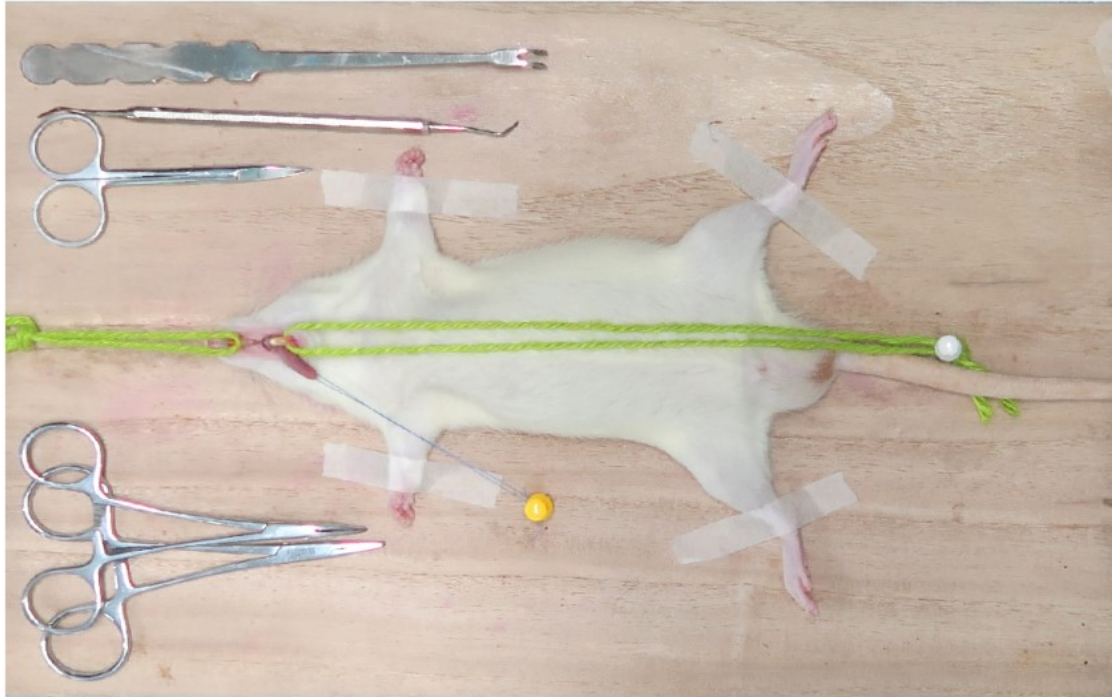

**Fig. S2.** Gross photographs of the rat's during model preparation.

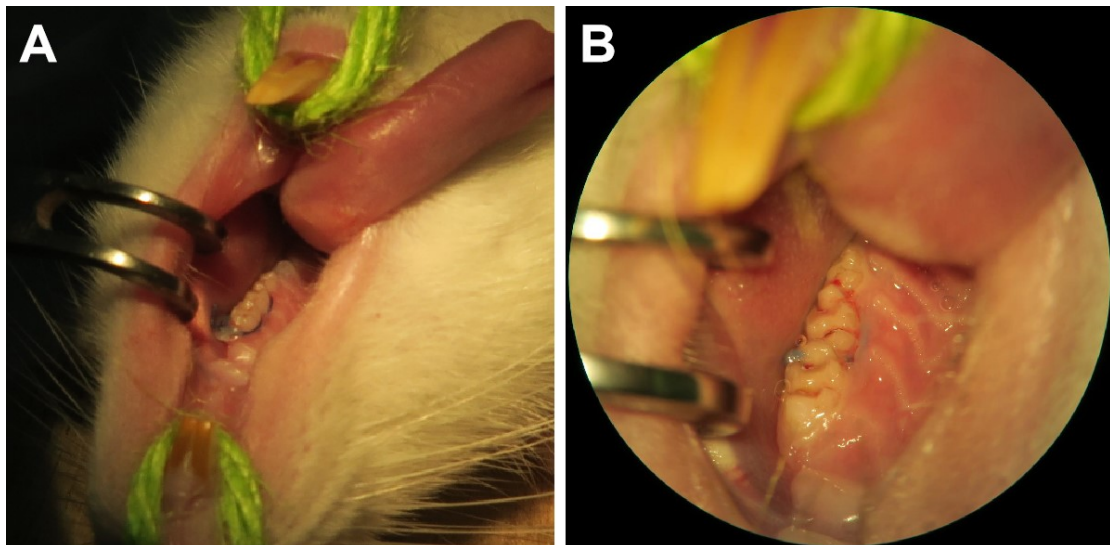

**Fig. S3.** (A) 5-0 silk thread with mixed bacteria ligated on the teeth. (B) Establishment of the  $\infty$ -ligature-induced periodontitis model.
